# Supplementary material
Source: Elsevier journal article supplement (https://www.sciencedirect.com/science/article/pii/S0300893218301258)
Supplement: mmc1 [file S0300893218301258:mmc1.docx]

**MATERIAL SUPLEMENTARIO**

**Diseño del Registro RENAMI**

El RENAMI *(REgistry of New Antiplatelet therapy in patients with acute Myocardial Infarction)* es un registro retrospectivo, observacional, multicéntrico e internacional en el que participaron voluntariamente 11 centros de 6 países europeos (España, Italia, Suiza, Grecia, Serbia y Reino Unido). Se trata de un registro no financiado, dependiente del investigador, que surge de la necesidad científica de comparar el beneficio clínico isquémico-hemorrágico del tratamiento antiagregante plaquetario doble (TAPD) con ticagrelor frente a prasugrel en pacientes con síndrome coronario agudo (SCA).

Durante la celebración del Congreso Europeo de Cardiología llevado a cabo en Roma en agosto de 2016, en una reunión de jóvenes investigadores, se propuso la realización de un registro común que abordase el aspecto antedicho, utilizando datos de los centros de los investigadores allí presentes.

Para ello, se diseñó una base de datos que se envió a cada uno de los 11 centros participantes. En dicha base de datos se incluyó retrospectivamente información acerca de variables clínicas, analíticas y angiográficas, así como datos relativos al seguimiento, en términos de mortalidad, eventos isquémicos y eventos hemorrágicos (tabla 1 del material suplementario). Las bases de datos cubiertas procedentes de cada centro se enviaron encriptadas al centro de coordinación, donde se fusionaron en un único registro.

**Criterios de inclusión del registro RENAMI**

Pacientes consecutivos que cumpliesen todos los siguientes requisitos:

*1.* Ser dados de alta de forma consecutiva con diagnóstico de SCA en cualquier franja temporal del periodo comprendido entre enero de 2012 y enero de 2016.

*2.* Tener evidencia de estenosis coronarias angiográficamente significativas (≥ 50% en el tronco de la coronaria izquierda; ≥ 70% en el resto del árbol coronario) durante el ingreso índice por SCA.

*3.* Realización de intervención coronaria percutánea (ICP) durante el ingreso índice por SCA.

*4.* Tener prescrita al alta con TAPD con ácido acetilsalicílico (100 mg/24 h) más prasugrel (10 mg/24 h) o con ácido acetilsalicílico (100 mg/24 h) más ticagrelor (90 mg/12 h).

**Tabla 1 del material suplementario**

Lista de las variables del registro RENAMI

| *Variables basales*  Fecha de ingreso (variable fecha)  Fecha de nacimiento (variable fecha)  Edad (variable continua; años)  Sexo (varón o mujer)  Diabetes mellitus (sí/no)  Hipertensión arterial (sí/no)  Dislipemia (sí/no)  Tabaquismo (sí/no)  Peso (variable continua; kg)  Talla (variable continua; cm)  Historia de cáncer en los últimos 5 años (sí/no)  Ingreso previo por hemorragia (sí/no)  Enfermedad arterial periférica (sí/no)  Ictus isquémico previo (sí/no)  Antecedente de infarto de miocardio (sí/no)  Antecedente de intervención coronaria percutánea (sí/no) |
| --- |
| *Modo de presentación*  Tipo de síndrome coronario agudo: angina inestable/infarto agudo de miocardio con elevación del segmento ST, infarto agudo de miocardio sin elevación del segmento ST  Parada cardiaca al ingreso (sí/no)  Clase Killip (I/II/III/IV)  Frecuencia cardiaca al ingreso (variable continua; lpm)  Presión arterial al ingreso (variable continua; mmHg)  Fibrilación auricular al ingreso (sí/no)  Creatinina al ingreso (variable continua; mg/dl)  Hemoglobina al ingreso (variable continua; g/dl)  Hematocrito al ingreso (variable continua; %) |
| *Tratamiento durante la hospitalización*  Coronariografía (sí/no)  Enfermedad multivaso (2 o más arterias coronarias con estenosis ≥ 70%)  Estenosis del tronco de la coronaria izquierda ≥ 50% (sí/no)  Tipo de *stent* (metálico o farmacoactivo)  Tipo de *stent* farmacoactivo (variable nominal)  Fecha de la intervención coronaria percutánea (variable fecha)  Tipo de acceso (femoral/radial)  Anticoagulación (heparina sódica/heparina de bajo peso molecular/fondaparinux/bivalirudina)  Inhibidores de la glucoproteína IIb/IIIa (sí/no) |
| *Eventos hospitalarios*  Hemorragia durante el ingreso (sí/no; clasificación BARC *[Bleeding Academic Research Consortium]*)  Infarto agudo de miocardio durante el ingreso (elevación de troponina ± clínica o cambios electrocardiográficos)  Ictus isquémico durante el ingreso (sí/no)  Fibrilación auricular durante el ingreso (sí/no)  Fracción de eyección del ventrículo izquierdo antes del alta (variable continua; %) |
| *Tratamiento al alta*  Ácido acetilsalicílico al alta (sí/no)  Ticagrelor al alta (sí/no)  Prasugrel al alta (sí/no)  Anticoagulación al alta (sí/no) |
| *Seguimiento*  Fecha del último seguimiento (variable fecha)  Muerte (sí/no)  Causa de muerte (variable nominal)  Fecha de muerte (variable fecha)  Hemorragia durante el seguimiento (clasificación BARC)  Fecha de la hemorragia (variable fecha)  Reingreso por síndrome coronario agudo durante el seguimiento (sí/no)  Fecha de reingreso por síndrome coronario (variable fecha)  Reinfarto durante el seguimiento (sí/no)  Fecha del reinfarto (variable fecha)  Trombosis del *stent* durante seguimiento (sí/no)  Fecha de la trombosis (variable fecha)  Ictus durante el seguimiento (sí/no)  Fecha del ictus (variable fecha)  Fecha de suspensión/cambio de tratamiento antiagregante plaquetario doble (variable fecha)  Motivo de suspensión/cambio de tratamiento antiagregante plaquetario doble (variable nominal) |

**Tabla 2 del material suplementario**

Centros participantes en el registro RENAMI

| País | Centro | Pacientes, n | Años | Ticagrelor frente a prasugrel |
| --- | --- | --- | --- | --- |
| España | 1 | 625 | 2013-2016 | El 76,5 frente al 23,5% |
| 2 | 303 | 2013-2015 | El 39,6 frente al 60,4% |
| 3 | 282 | 2013-2015 | El 51,15 frente al 48,9% |
| Reino Unido | 1 | 641 | 2013-2015 | El 19,5 frente al 80,5% |
| Suiza | 1 | 415 | 2012-2015 | El 60,0 frente al 40,0% |
| Serbia | 1 | 338 | 2013-2015 | El 99,4 frente al 0,6% |
| Grecia | 1 | 677 | 2012-2013 | El 53,3 frente al 46,7% |
| Italia | 1 | 533 | 2012-2015 | El 94,6 frente al 5,4% |
| 1 | 225 | 2013-2015 | El 68,9 frente al 31,1% |
| 1 | 220 | 2013-2015 | El 74,5 frente al 25,5% |
| 1 | 165 | 2014-2015 | El 53,9 frente al 46,1% |

**Tabla 3 del material suplementario**

Análisis univariable de las trombosis del *stent* en el primer año y en el primer mes

| Variables | TS en el primer año | | | TS en el primer mes | | |
| --- | --- | --- | --- | --- | --- | --- |
| sHR | IC95% | p | sHR | IC95% | p |
| Edad | 1,03 | 1,01-1,05 | < 0,001 | 1,06 | 1,02-1,09 | 0,002 |
| Sexo femenino | 0,96 | 0,66-1,40 | 0,844 | 1,02 | 0,58-1,80 | 0,946 |
| Hipertensión arterial | 1,44 | 0,99-2,08 | 0,054 | 0,89 | 0,61-1,29 | 0,535 |
| Diabetes mellitus | 1,54 | 0,82-2,88 | 0,179 | 0,85 | 0,39-1,83 | 0,679 |
| Dislipemia | 1,03 | 0,84-1,26 | 0,762 | 0,90 | 0,63-1,29 | 0,585 |
| Tabaquismo activo | 0,98 | 0,78-1,24 | 0,899 | 1,12 | 0,841,49 | 0,433 |
| Antecedente de IAM | 1,70 | 0,97-2,97 | 0,063 | 1,82 | 1,40-2,37 | < 0,001 |
| IAMCEST | 1,48 | 0,99-2,21 | 0,057 | 1,41 | 0,76-2,63 | 0,271 |
| FEVI < 40% | 2,71 | 1,36-5,42 | 0,005 | 2,78 | 1,33-5,11 | 0,005 |
| Hemoglobina (por cada 1 g/dl) | 0,83 | 0,74-0,93 | 0,002 | 0,93 | 0,71-1,22 | 0,599 |
| Creatinina (por cada 1 mg/dl) | 1,46 | 1,34-1,59 | < 0,001 | 1,36 | 1,22-1,50 | < 0,001 |
| Enfermedad multivaso | 1,25 | 0,80-1,94 | 0,328 | 1,12 | 0,43-2,93 | 0,809 |
| Inhibidores de la glucoproteína IIb/IIIa | 1,59 | 1,04-2,41 | 0,030 | 0,82 | 0,27-2,44 | 0,720 |
| Ticagrelor frente a prasugrel | 0,97 | 0,56-1,68 | 0,915 | 1,22 | 0,76-1,96 | 0,408 |
| SFA de nueva generación frente a SM | 0,99 | 0,59-1,70 | 0,990 | 2,70 | 0,40-18,11 | 0,307 |

FEVI: fracción de eyección del ventrículo izquierdo; IAM: infarto agudo de miocardio; IAMCEST: infarto agudo de miocardio con elevación del segmento ST; IC95%: intervalo de confianza del 95%; SFA: *stent* farmacoactivo; sHR: *subhazard* *ratio;* SM: *stent* metálico; TS: trombosis del *stent*.

**Figura del material suplementario.** Curva de Kaplan-Meier para mortalidad y/o trombosis del *stent* según el tipo de antiagregante. IC95%: intervalo de confianza del 95%; RMST: *restricted mean survival time;* TAPD: tratamiento antiagregante plaquetario doble; TS: trombosis del *stent*.
